# Supplementary material
Source: PubMed Central journal article supplement (PMC3475498)
Supplement: NIHMS409247-supplement-1_si_001.pdf [file NIHMS409247-supplement-1_si_001.pdf]

# **Supporting Information for**

## **Aging Mechanism of Soman Inhibited Acetylcholinesterase**

Gulseher Sarah Sirin<sup>1,2</sup>, Yanzi Zhou<sup>2,3</sup>, Lee Lior-Hoffmann<sup>2</sup>, Shenglong Wang<sup>2</sup>,  
and Yingkai Zhang<sup>\*,2</sup>

<sup>1</sup> *Sackler Institute of Graduate Biomedical Sciences, New York University School of Medicine, New York, New York, 10016*

<sup>2</sup> *Department of Chemistry, New York University, New York, New York, 10003*

<sup>3</sup> *Institute of Theoretical and Computational Chemistry, Key Laboratory of Mesoscopic Chemistry, School of Chemistry and Chemical Engineering, Nanjing University, Nanjing 210093, P.R. China*

\* To whom correspondence should be addressed. E-mail: [yingkai.zhang@nyu.edu](mailto:yingkai.zhang@nyu.edu)

**Figure S1-S6 and Table S1.**

**Figure S1.** Illustration of the QM/MM sub-system partition for the (a) initial dealkylation and the (b) hydration of tertiary carbenium ion reaction steps of aging: Black, MM subsystem; Red, boundary carbon atoms in the QM subsystem described by improved pseudobond parameters; Blue (magenta), all other atoms in the QM sub-system.

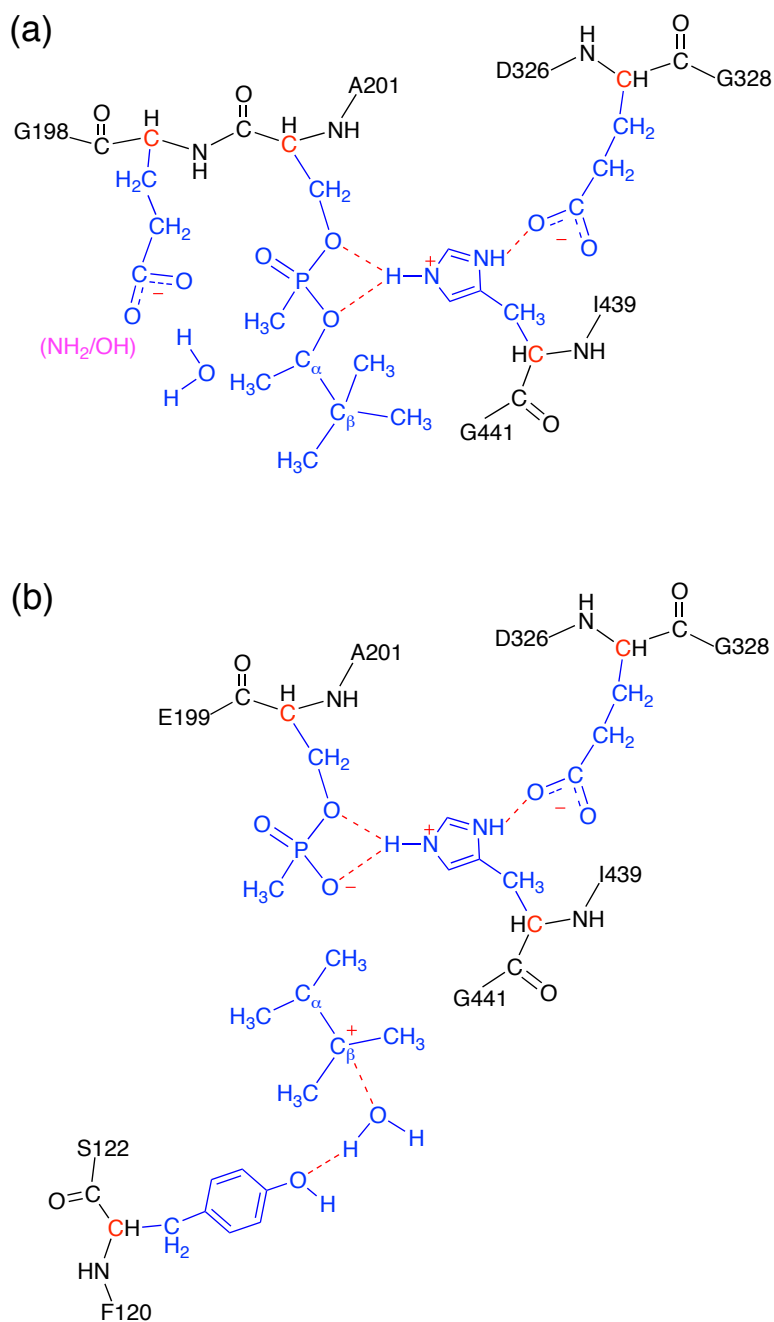

**Figure S2.** *Unprotonated Glu199 model (the attempt to examine the proposed protonation-deprotonation mechanism):* (a) The chosen reaction coordinate; (b) potential energy profile; and (c) illustration of structures along the reaction coordinate for proton transfer from the doubly protonated His440<sup>+</sup> NE2 nitrogen to soman O2 oxygen. Protonated soman is energetically unfavorable and collapses back to the reactant conformation during unrestrained geometry optimization.

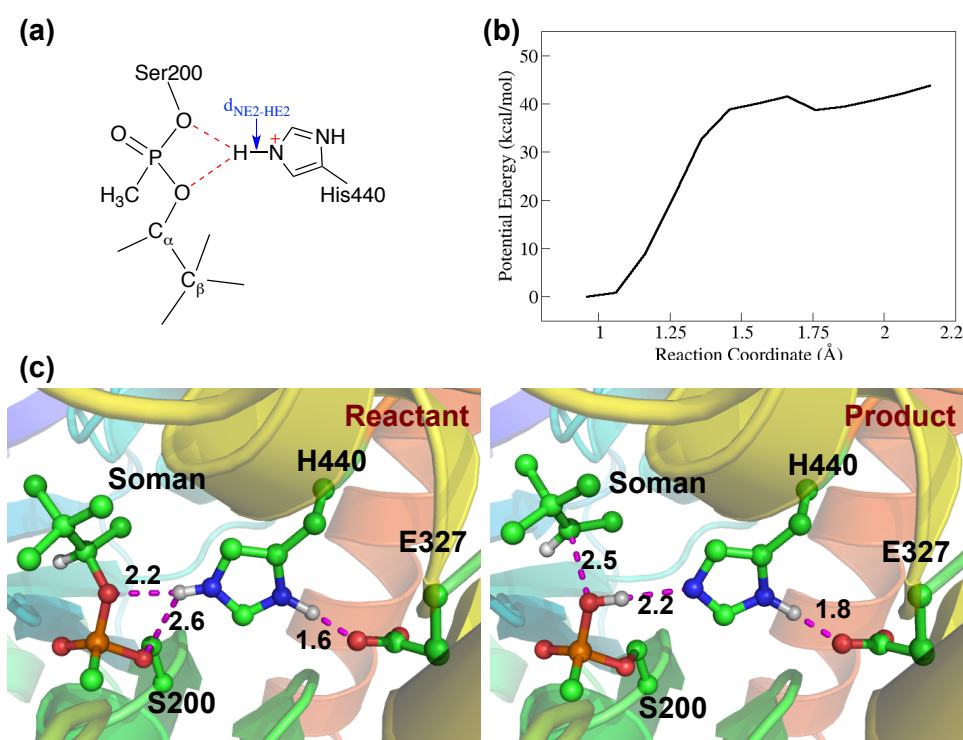

**Figure S3.** Unprotonated Glu199 model (another attempt to examine the proposed protonation-deprotonation mechanism): (a) The chosen reaction coordinate; (b) calculated free energy profile; and (c) illustration of key structures along proton transfer and concerted cleavage of the alkyl chain reaction. The total length of ab initio QM/MM MD simulations for this reaction path is 460 ps (23 windows \* 20 ps each).

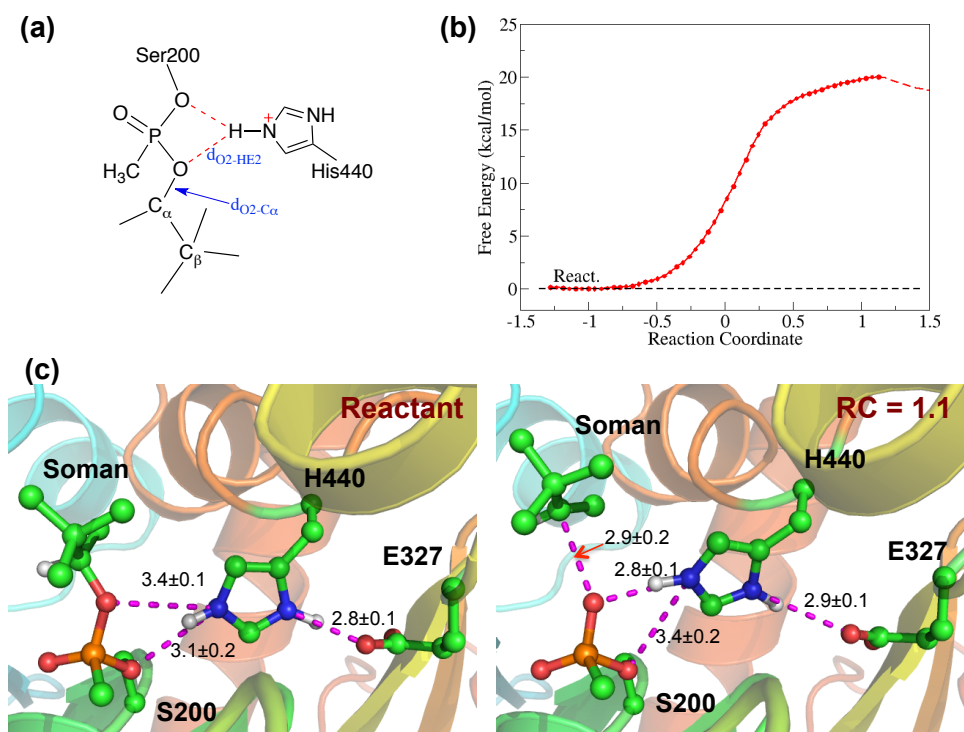

**Figure S4.** *Unprotonated Glu199 model (the attempt to examine the O-dealkylation mechanism): (a) The chosen reaction coordinate; (b) calculated free energy profile; and (c) illustration of key structures along the O-dealkylation mechanism of aging. The total length of ab initio QM/MM MD simulations for this reaction path is 540 ps (27 windows \* 20 ps each).*

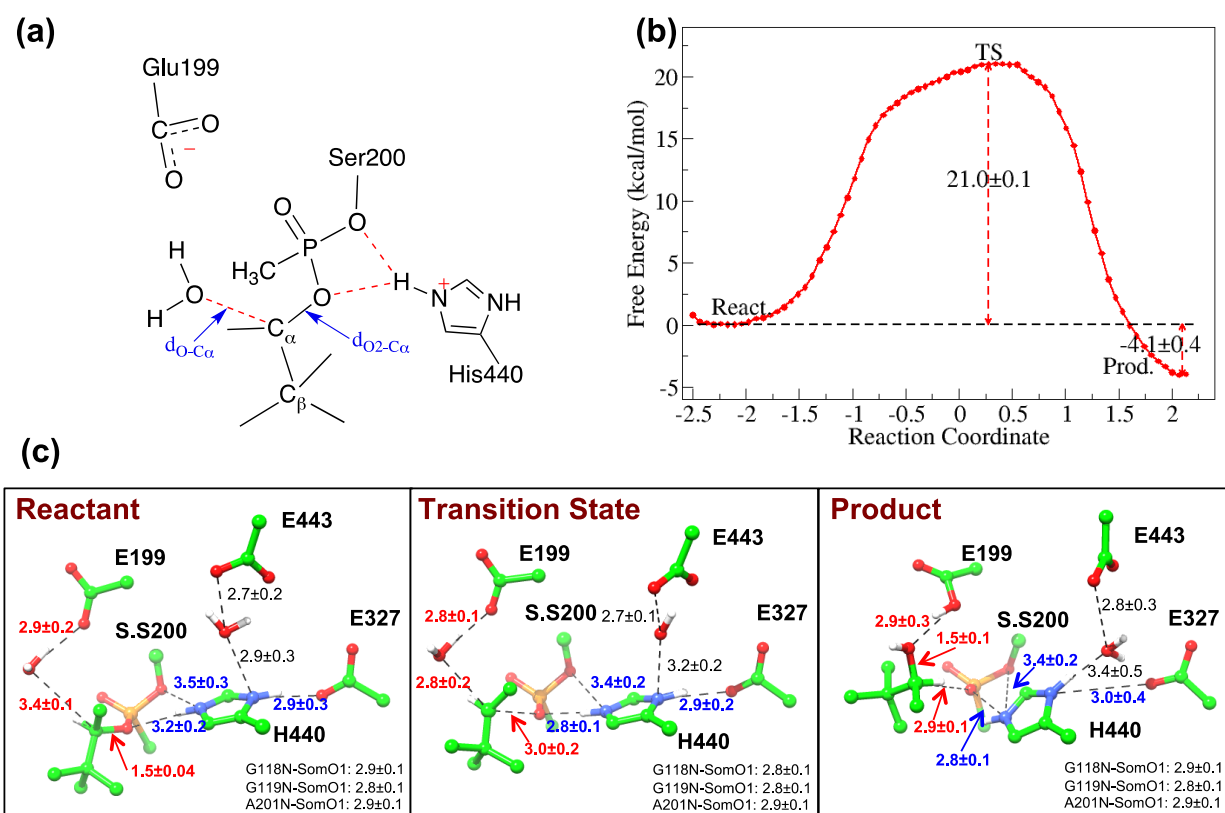

**Figure S5.** Illustration of the chosen reaction coordinates used to characterize (a) the initial methyl-migration and (b) the secondary hydration steps of the aging/dealkylation mechanism.

(a)

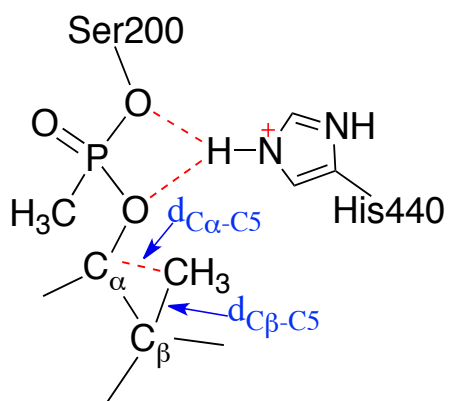

(b)

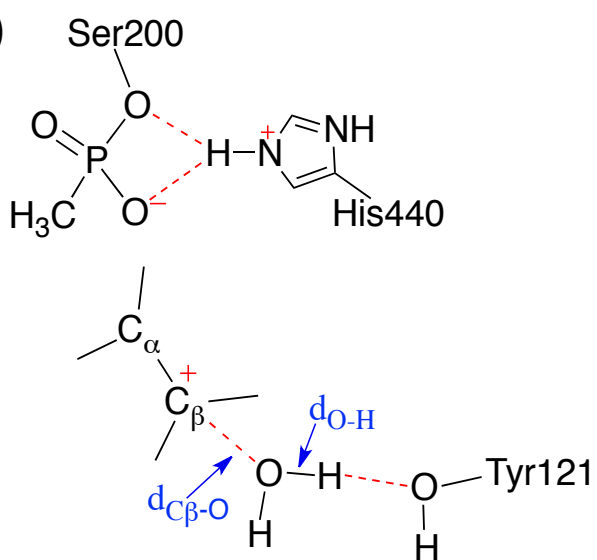

**Figure S6.** (a) Scatter plot of His440<sup>+</sup>  $\chi_1$  and  $\chi_2$  torsion angles measured for the reactant (red) and the rate determining transition state (blue) for the methyl migration step of aging. (b) Histograms of His440<sup>+</sup>  $\chi_1$  and  $\chi_2$  torsion angles for the reactant (R) and transition state (TS): red, Glu199; blue, Glu199Gln; green; Glh199. Torsion angles  $\chi_1$  and  $\chi_2$  are measured along the last 15ps of QM/MM MD simulations and negative values were transposed by adding 360° in an effort to provide better visualization.

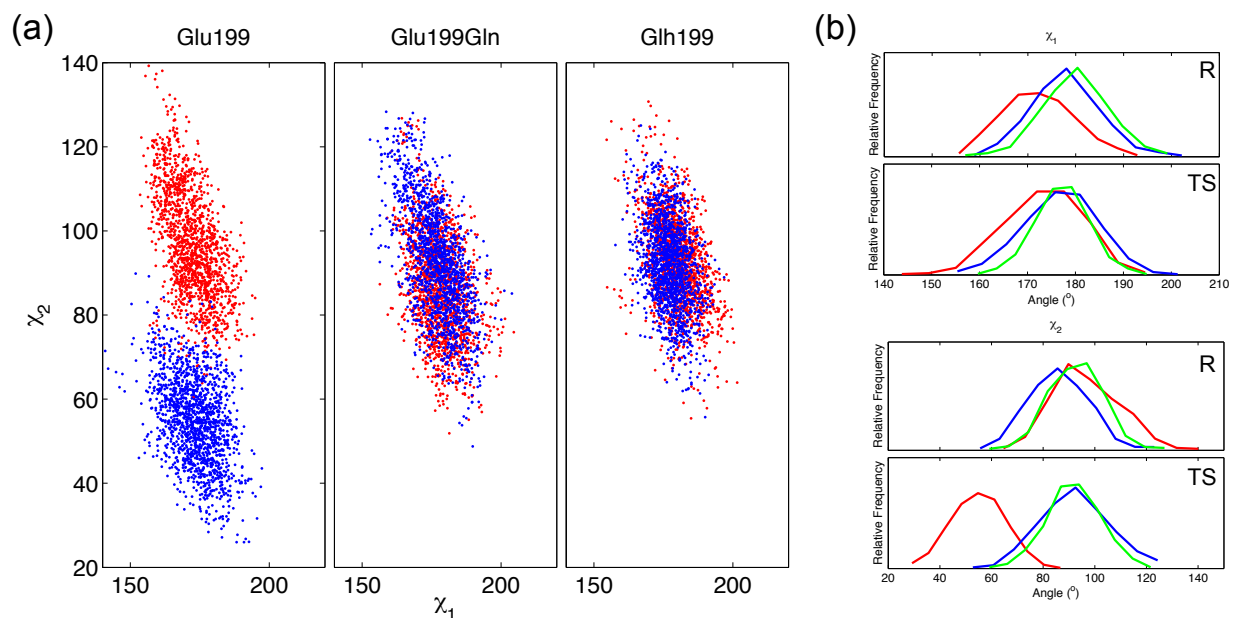

**Table S1.** RESP partial charges, atom types and connectivity for soman modified serine residue.

|    | Atom Name      | Atom Type | Connectivity | Partial Charge |
|----|----------------|-----------|--------------|----------------|
| 1  | N              | N         | M            | -0.4147        |
| 2  | H              | H         | E            | 0.2719         |
| 3  | CA             | CT        | M            | -0.0420        |
| 4  | HA             | H1        | E            | 0.0962         |
| 5  | CB             | CT        | 3            | 0.1929         |
| 6  | HB1            | H1        | E            | 0.0622         |
| 7  | HB2            | H1        | E            | 0.0622         |
| 8  | OG             | OS        | S            | -0.4692        |
| 9  | P              | P         | 3            | 1.1479         |
| 10 | C1             | CT        | 3            | -0.6429        |
| 11 | HC11           | HC        | E            | 0.1871         |
| 12 | HC12           | HC        | E            | 0.1871         |
| 13 | HC13           | HC        | E            | 0.1871         |
| 14 | O1             | O2        | E            | -0.6749        |
| 15 | O2             | OS        | S            | -0.4630        |
| 16 | C2( $\alpha$ ) | CT        | 3            | 0.1855         |
| 17 | HC21           | H1        | E            | 0.0621         |
| 18 | C3             | CT        | 3            | -0.5486        |
| 19 | HC31           | HC        | E            | 0.1551         |
| 20 | HC32           | HC        | E            | 0.1567         |
| 21 | HC33           | HC        | E            | 0.1415         |
| 22 | C4( $\beta$ )  | CT        | 3            | 0.5255         |
| 23 | C5             | CT        | 3            | -0.2916        |
| 24 | HC51           | HC        | E            | 0.0617         |
| 25 | HC52           | HC        | E            | 0.0617         |
| 26 | HC53           | HC        | E            | 0.0617         |
| 27 | C6             | CT        | 3            | -0.4144        |
| 28 | HC61           | HC        | E            | 0.0888         |
| 29 | HC62           | HC        | E            | 0.0888         |
| 30 | HC63           | HC        | E            | 0.0888         |
| 31 | C7             | CT        | 3            | -0.3773        |
| 32 | HC71           | HC        | E            | 0.0790         |
| 33 | HC72           | HC        | E            | 0.0790         |
| 34 | HC73           | HC        | E            | 0.0790         |
| 35 | C              | C         | M            | 0.5973         |
| 36 | O              | O         | E            | -0.5679        |
